# Supplementary material for: Increasing the oxygen-containing functional groups of oxidized multi-walled carbon nanotubes to improve high-rate-partial-state-of-charge performance
Source: Royal Society of Chemistry journal article supplement (doi:10.1039/d1ra08667g), 2022-01-01
Supplement: d1ra08667g1.pdf [file d1ra08667g1.pdf]

### *Support information*

## Increasing the Oxygen-Containing Functional Groups of Oxidized Multi-Walled Carbon Nanotubes to Improve High-Rate-Partial-State-of-Charge Performance

### **Characterization of the materials**

X-ray diffraction (XRD) measurements of the as-prepared materials were conducted using a Rigaku Ultima IV diffractometer with Cu K $\alpha$  radiation ( $\lambda = 0.1548$  nm) in steps of 0.02, the relative contents of substances in different samples were calculated by using the strongest peak. transmission electron microscopy (FEI Tecnai F30, 300 kV) were employed to observe effect of acid pickling on multi walled carbon nanotubes.

### **Study on hydrophilicity of MWCNTs suspension**

By taking a quantitative solution in 9 mg·ml<sup>-1</sup> multi walled carbon nanotubes, pour them into the glass bottle as shown in Fig. S3, shake the glass bottle fully, after standing for one hour, the state of multi wall carbon nanotube suspension was observed.

### **Schematic diagram of oxygen-containing functional groups on multi wall carbon nanotubes**

The change trend of different kinds of oxygen-containing groups was indicated by the

length of acid-treatment time, As shown in the Fig. S4.

## **Specific numerical table of electrochemical performance of lead-acid battery**

In this experiment, the energy storage performance of the battery is mainly characterized by electrochemical test, including EIS CV capacity and cycle life. EIS of negative plate is used for equivalent circuit fitting of impedance data, as shown in the Fig.4A. The classical R (Q (RZ)) equivalent circuit is used, and the fitting results are shown in table.S1. Where  $R_s$  corresponds to the ohmic resistance of electrolyte,  $R_{ct}$  is the charge transfer resistance in electrochemical process,  $Z_w$  is the Warburg impedance, which is related to diffusion.

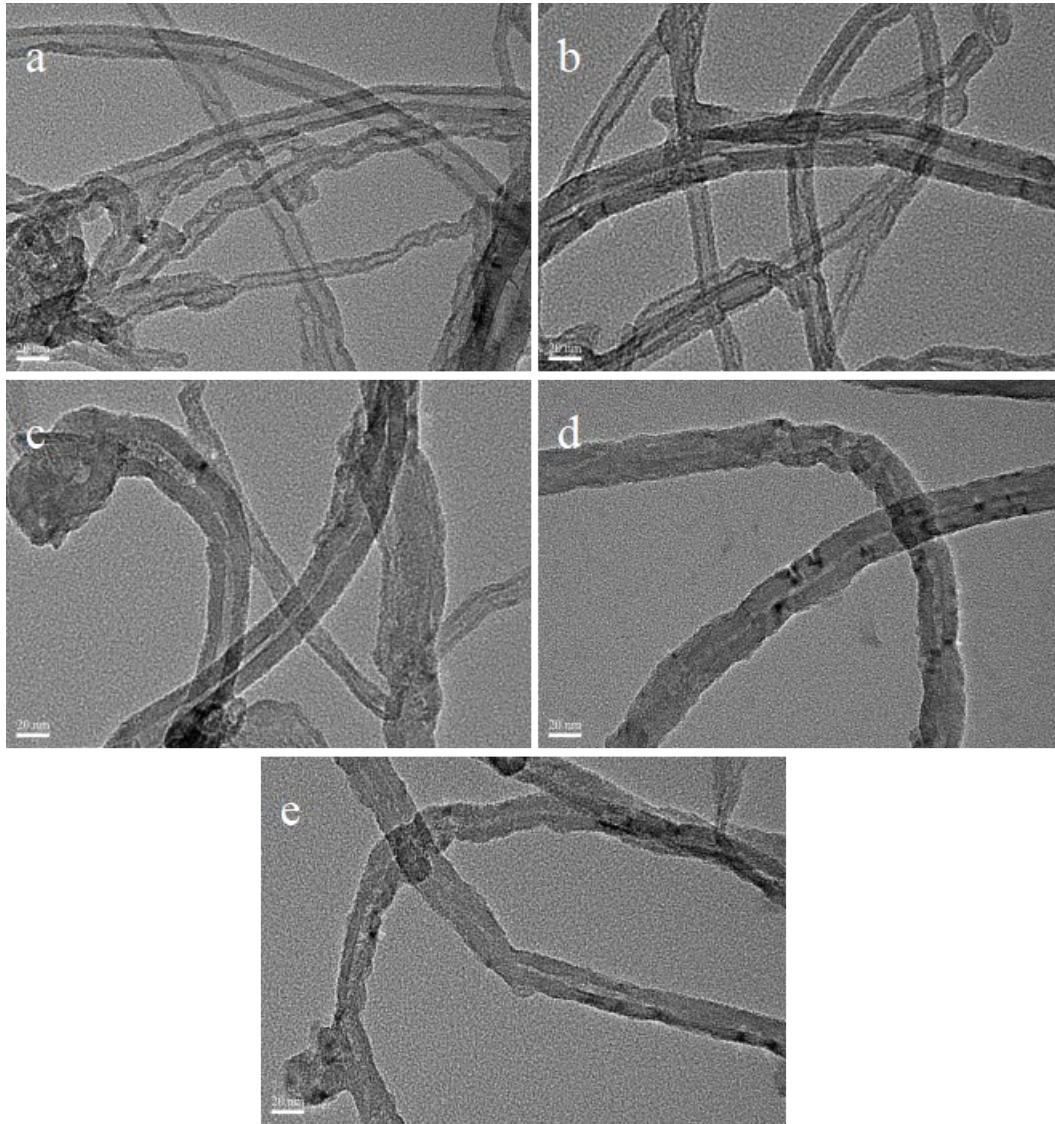

**Fig. S1.** TEM images of different carbon samples: MWCNTs (a), MWCNTs-2h (b), MWCNTs-6h (c), MWCNTs-12h (d) and MWCNTs-24h (e).

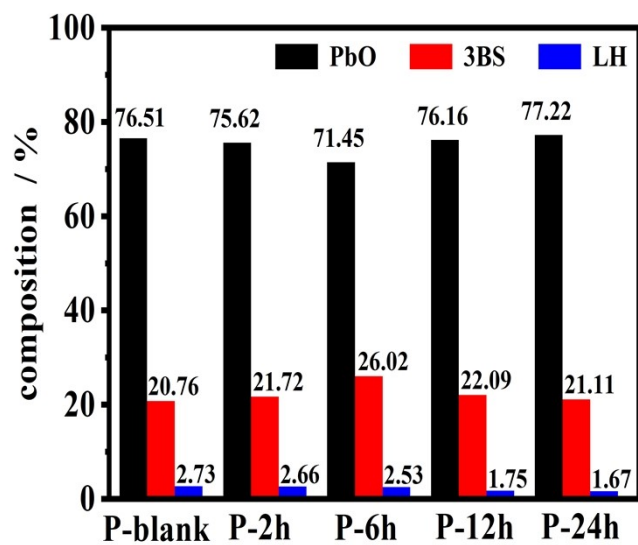

Fig. S2. Compositions of the NAMs collected from the interior of the cured negative plates.

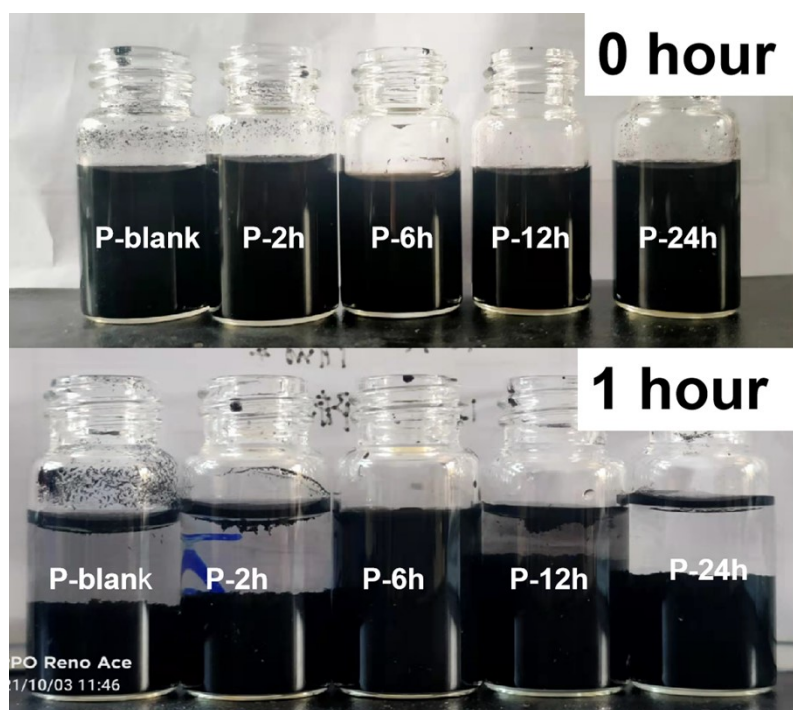

Fig. S3. Physical diagram of hydrophilicity of multi wall carbon nanotubes

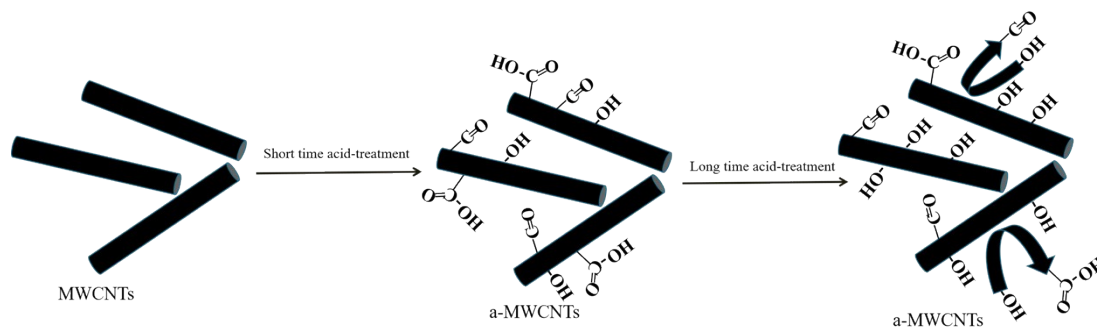

**Fig. S4.** Schematic diagram of oxygen-containing functional groups on multi wall carbon nanotubes

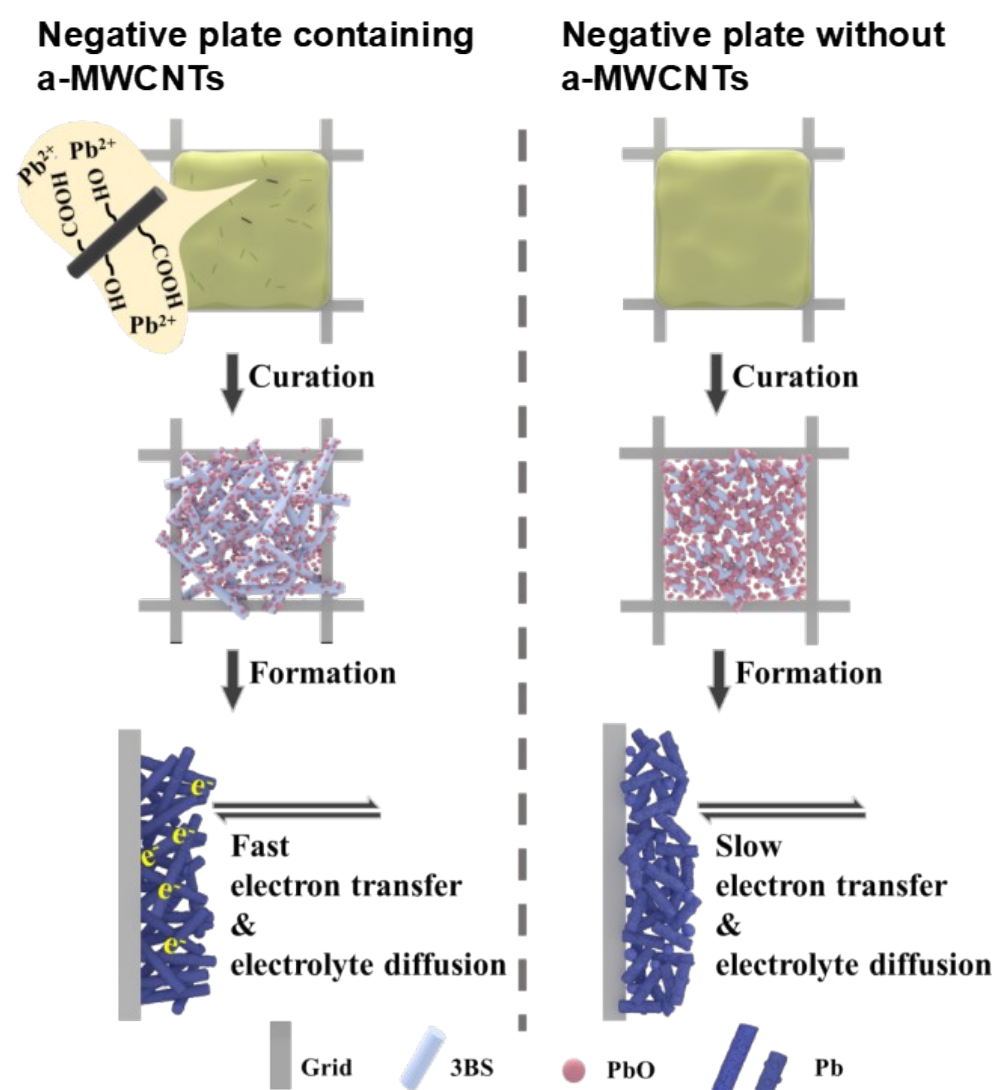

**Fig. S5.** Schematic diagram of HRPSoC enhancement mechanism of battery assembled with negative plate containing a-MWCNTs

**Table. S1** Simulation in equivalent circuits of the EIS spectra of different plates

| Samples | $R_s$<br>( $\Omega \cdot \text{cm}^2$ ) | <i>Electroconductivity</i><br>( $\text{S} \cdot \text{cm}^{-2}$ ) | $Q_{dl}$<br>( $\text{Ss}^n \cdot \text{cm}^{-2}$ ) | $R_{ct}$<br>( $\Omega \cdot \text{cm}^2$ ) | $Z_W$<br>( $\text{Ss}^n \cdot \text{cm}^{-2}$ ) | Error<br>(%) |
|---------|-----------------------------------------|-------------------------------------------------------------------|----------------------------------------------------|--------------------------------------------|-------------------------------------------------|--------------|
| P-blank | 0.09126                                 | 47.53                                                             | 0.976                                              | 0.1026                                     | 136.8                                           | 1.2386       |
| P-2h    | 0.072037                                | 47.55                                                             | 1.141                                              | 0.0937                                     | 125.7                                           | 0.8756       |
| P-6h    | 0.05739                                 | 47.94                                                             | 1.225                                              | 0.0701                                     | 76.4                                            | 0.8796       |
| P-12h   | 0.06086                                 | 49.15                                                             | 1.158                                              | 0.0875                                     | 88.1                                            | 1.3588       |
| P-24h   | 0.07047                                 | 49.15                                                             | 0.977                                              | 0.0984                                     | 130.7                                           | 1.7585       |

**Table. S2** Specific values of capacitance and number of cycles

| Electrochemical properties | Plate-blank | Plate-2h | Plate-6h | Plate-12h | Plate-24h |
|----------------------------|-------------|----------|----------|-----------|-----------|
| Capacity/mAh               | 0.6257      | 0.7687   | 0.8176   | 0.7838    | 0.7384    |
| Cycle number               | 19712       | 26430    | 39580    | 33764     | 21915     |

**Table. S3** Specific values associated with CV tests

| Samples | Oxidation peak current | Reduction peak current | Oxidation peak area | Reduction peak area | Oxidation potential | Reduction potential |
|---------|------------------------|------------------------|---------------------|---------------------|---------------------|---------------------|
| P-blank | 1.863                  | -1.716                 | 0.618               | 0.452               | -0.708              | -1.863              |
| P-2h    | 2.717                  | -2.400                 | 0.755               | 0.615               | -0.849              | -1.225              |
| P-6h    | 3.504                  | -3.036                 | 0.912               | 0.767               | -0.576              | -1.218              |
| P-12h   | 2.950                  | -2.789                 | 0.925               | 0.740               | -0.832              | -1.250              |
| P-24h   | 2.329                  | -1.971                 | 0.739               | 0.478               | -0.786              | -1.259              |
